# Supplementary material for: Nitric oxide induces cotyledon senescence involving co-operation of the NES1/MAD1 and EIN2-associated ORE1 signalling pathways in Arabidopsis
Source: PubMed Central journal article supplement (PMC4106434; doi:10.1093/jxb/ert429), 2013-12-12
Supplement: supp_ert429_jexbot109918_file001.pdf [file supp_ert429_jexbot109918_file001.pdf]

## Supplementary data

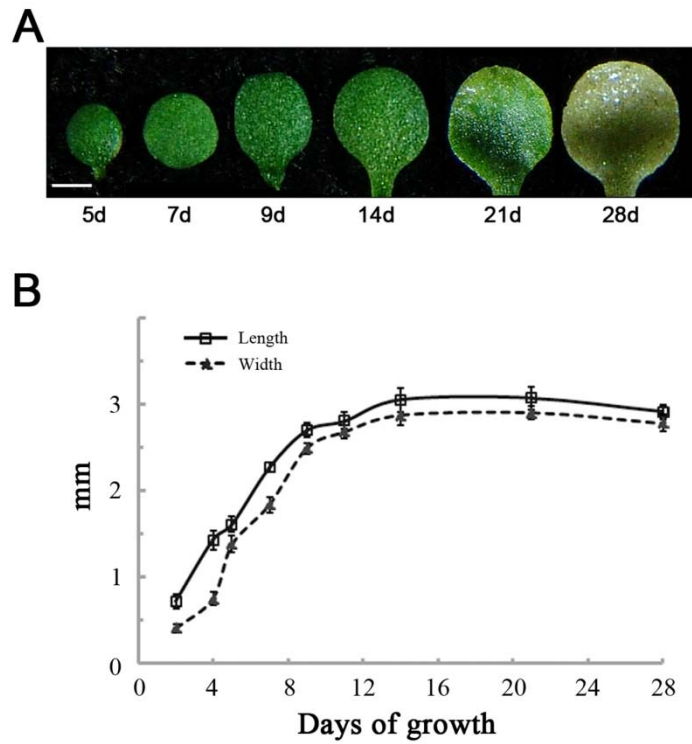

**Figure 1. Age-dependent cotyledon senescence process.**

**(A)** Developmental cotyledon senescence in the wild type, Bar= 1mm.

**(B)** Cotyledon width and length in the wild type during development.

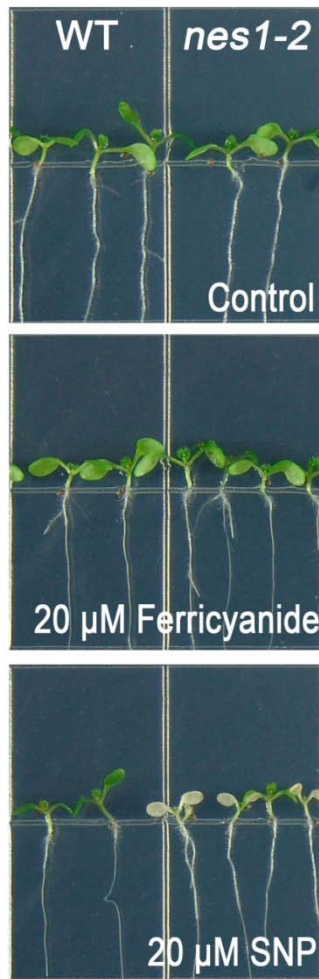

**Figure 2. Nitric oxide induces cotyledon senescence**

Phenotype comparison of the 5-day-old wild type (WT) and *nes1-2* treated as indicated for 72 hours.

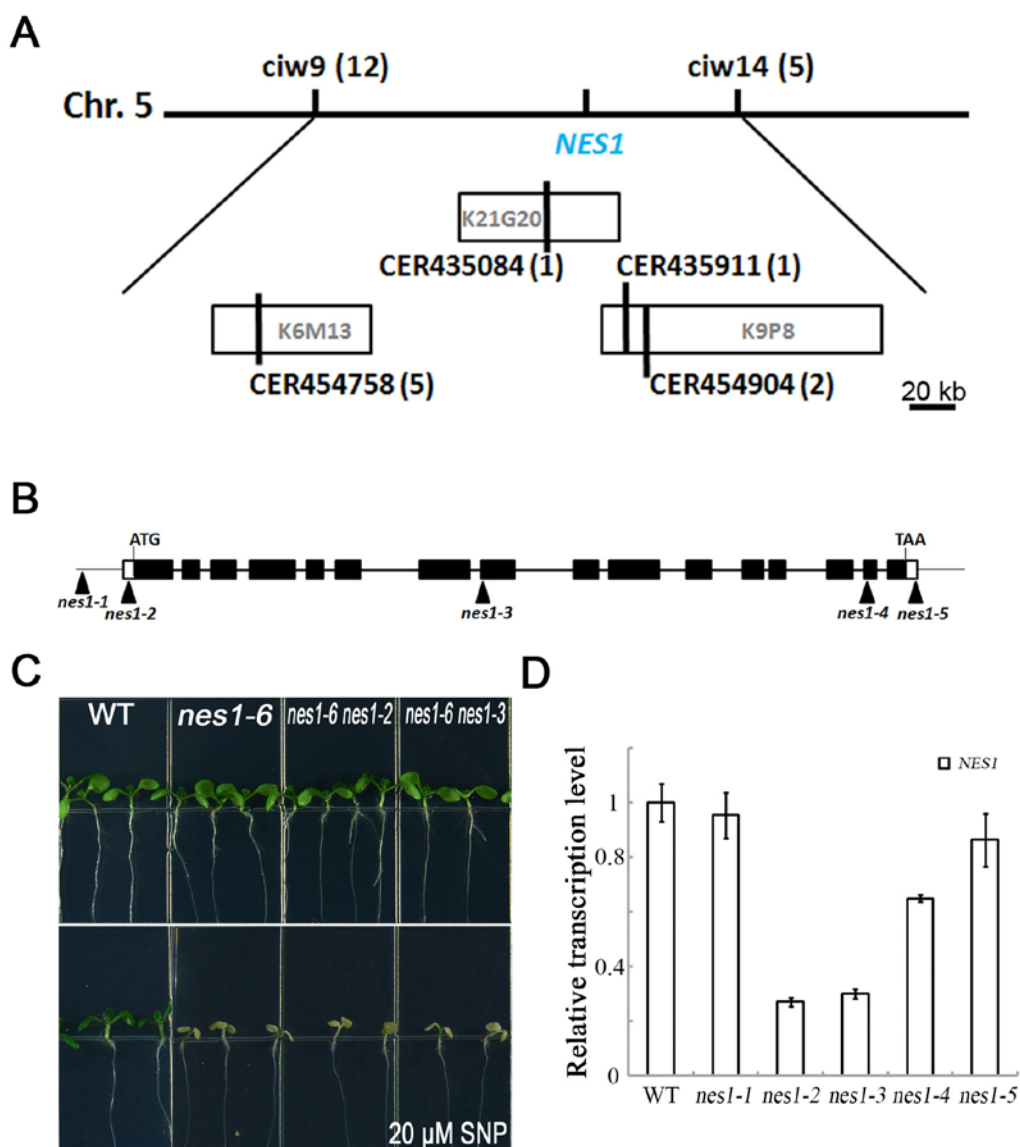

**Figure 3. The fine genetic and physical map-based cloning of *NES1*.**

**(A)** Fine genetic and physical mapping of *NES1*. **(B)** T-DNA insertion locations of the five *nes1* mutants. **(C)** Phenotype analyses of F1 generation: *nes1-6* cross with *nes1-2* and *nes1-3* separately. Plants treated with 20  $\mu$ M nitroprusside for 72 hours. **(D)** The transcription levels of the five *nes1* mutants, with quantitative real-time PCR analysis.

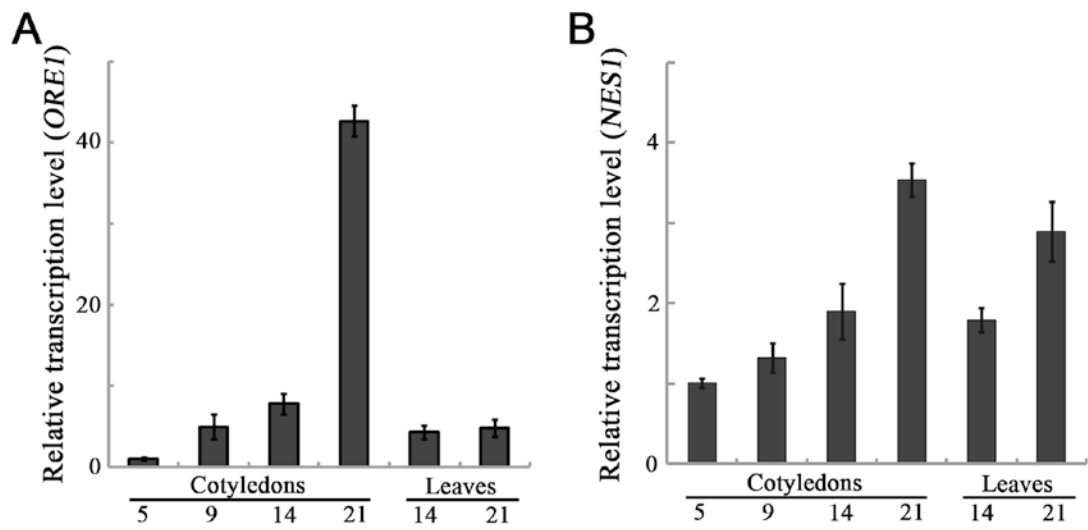

**Figure 4. The transcription level of *ORE1* and *NES1* during cotyledon and leaf development.**

**(A)** Comparison of the *ORE1* expression in cotyledons and leaves in the wild type. Transcript quantified as in Fig. S2D. **(B)** The *NES1* expression in cotyledons and leaves in the wild type. Transcript quantified as in Fig. S2D.

**Table 1. Genetic analysis of allelic *NES1*.**

| F0                |                    | F1 progeny     | F <sub>2</sub> progeny |                 |
|-------------------|--------------------|----------------|------------------------|-----------------|
| Insensitive to NO | Sensitive to NO    | Insensitive    | Insensitive            | Sensitive       |
| WT ( <i>NN</i> )  | <i>nes1-6 (nn)</i> | <i>Nn</i> (17) | <i>NN, Nn</i><br>(886) | <i>Nn</i> (301) |

Phenotypic ratio in F<sub>2</sub> generation: (886:301=2.94:1≈3:1)

**Table 2. Primers for semi-quantitative RT-PCR.**

| Gene         | Locus     | Name     | Primer sequence        | PCR condition<br>temperature/cycles |
|--------------|-----------|----------|------------------------|-------------------------------------|
| <i>AtUBQ</i> | AT5G25760 | AtUBQ -F | CAAGAGCGCGACTGTTTAAA   | 58°C / 23                           |
|              |           | AtUBQ -R | CATTTGTGCCATTGAATTGAAC |                                     |
| <i>SAG12</i> | AT5G45890 | SAG12-F  | TTTCAAAGGTGTCTCGGCATTA | 60°C / 29                           |
|              |           | SAG12-R  | GCCGTATCCAATCGCAGTTA   |                                     |
| <i>SAG13</i> | AT2G29350 | SAG13-F  | TCCTCTGCTGCTGGAGTCGTG  | 62°C / 29                           |
|              |           | SAG13-R  | GCCGTCAACGCAAATGGTCT   |                                     |
| <i>CAB2</i>  | AT1G29920 | CAB2-F   | TGGAGACTACGGATGGGACA   | 58°C / 23                           |
|              |           | CAB2-R   | GTGACGATGGCTTGAACGAA   |                                     |

**Table 3. Primers for quantitative real-time PCR.**

| <b>Gene</b>   | <b>Locus</b> | <b>Primer name</b> | <b>Primer sequence</b>  |
|---------------|--------------|--------------------|-------------------------|
| <i>ACT II</i> | At3g18780    | ACT II -F          | GGTAACATTGTGCTCAGTGGTGG |
|               |              | ACT II -R          | AACGACCTTAATCTTCATGCTGC |
| <i>ORE1</i>   | At5g39610    | ORE1-F             | CACCAGGATTCAGATTTAC     |
|               |              | ORE1-R             | TCTCCCATCTTAGCCTTCC     |
| <i>EIN2</i>   | At5g03280    | EIN2-F             | CACGATGCCTTGTCACTA      |
|               |              | EIN2-R             | CAAGCGGGTATTTCTATCT     |
| <i>NES1</i>   | At5g49880    | NES1-F             | CTTGAAAGGATGCAATGTAGG   |
|               |              | NES1-R             | CTCCGAAGTGAATGACGATAG   |
